# Supplementary material
Source: publisher site journal article supplement (https://www.spandidos-publications.com/6847/downloadSupplementary)
Supplement: Supplementary file 1 [file downloadSupplementary]

## Sheet: STableIV GSEInfo
Table SIV. Parameters of the GEO microarray datasets harboring expression profiles for EGFR-mutant lung cancer and normal lung with relevant clinical information.
Geo Dataset	Array Platform	No. of probes	No. of array	Pathological stage	Survival information
GSE31210	Affymetrix- HG-U133_Plus_2	54675	Tumor=127; Normal Lung=20	Stage I= 103; Stage II=24	Relapse and overall survival
GSE27262	Affymetrix- HG-U133_Plus_2	54675	Tumor=19; Normal Lung=19	Stage I= 19	NA
GSE31547	Affymetrix- HG-U133A	22277	Tumor=14; Normal Lung=20	Stage I=8; Stage II=4; Stage III=2	Relapse and overall survival
GSE31548	Affymetrix- HG-U133B	22645	Tumor=14; Normal Lung=20	Stage I=8; Stage II=4; Stage III=2	Relapse and overall survival
GSE32863	Illumina- HumanWG-6 v3.0	48803	Tumor=17; Normal Lung=17	Stage I=8; Stage II=4; Stage III=5	NA
GSE75037	Illumina- HumanWG-6 v3.0	48803	Tumor=20; Normal Lung=20	Stage I=10; Stage II=6; Stage III=4	NA
